# Supplementary material
Source: MDPI journal article supplement (https://www.mdpi.com/2504-2289/3/1/10)
Supplement: s1 [file s1]

Word	Polysemy_Score	Log_Frequency	Word_Length	Is_Noun	Multidegree	Mult_Closeness	Vers_PagRank	Free_Degree	Learned_n264
a	3	14.930090351460876	1	0	207	0.6182669789227166	0.013070435021217344	2	0
above	5	9.120196822123217	5	0	6	0.35083056478405317	0.0007662736702917288	6	0
after	5	11.64567154932091	5	0	12	0.4177215189873418	0.0010590688034476554	7	0
airplane	1	7.463936604468925	8	1	58	0.48574057037718493	0.002512450309840489	8	1
all	4	13.547734375450759	3	0	52	0.48	0.003343906617924838	4	0
alligator	3	6.059123195581797	9	1	47	0.42996742671009774	0.0019424293571642022	4	0
animal	2	9.01127949117793	6	1	43	0.4743935309973046	0.002395220258185566	38	1
ankle	1	6.931471805599453	5	1	4	0.3249230769230769	0.0013530281336774277	3	0
another	2	11.257904174757996	7	0	25	0.4463229078613694	0.0015580796351331336	4	0
ant	1	6.70073110954781	3	1	37	0.4254633360193392	0.001666503711859862	5	1
apple	2	8.172164452111904	5	1	52	0.48753462603878117	0.0024712890642629853	16	1
arm	8	9.176162920174596	3	1	9	0.3579661016949153	0.001576788497623096	8	1
around	11	11.527124184370042	6	0	21	0.44594594594594594	0.001447628137125866	8	0
asleep	5	9.131621787264777	6	0	10	0.35991820040899797	0.001371790912086392	10	1
aunt	1	9.236884927198295	4	1	1	0.24558139534883722	0.0005820888993534802	1	0
awake	3	8.437933510430605	5	0	8	0.3548387096774194	0.0013272501802708827	7	0
away	15	11.756114751282448	4	0	28	0.4429530201342282	0.0022074242382252958	16	0
baby	8	11.10152276419531	4	1	44	0.4664310954063604	0.002372014449043087	23	1
back	28	12.600406025209786	4	0	49	0.47696476964769646	0.0033731215162515543	8	0
bad	17	11.274389049048537	3	0	25	0.46033129904097647	0.002773684450015649	11	1
ball	12	9.625293657956655	4	1	79	0.5076923076923077	0.004179653444866695	20	1
balloon	4	7.022868086082641	7	1	78	0.49025069637883006	0.003085080291485225	11	1
banana	2	7.224753405767971	6	1	63	0.48440366972477067	0.002589639589721168	4	1
basement	2	7.898411092811599	8	1	14	0.39788997739261495	0.0010246297557786781	7	0
basket	4	7.440146680662688	6	1	32	0.4213886671987231	0.0015862844216008925	8	0
bat	10	7.927685045615778	3	1	63	0.46808510638297873	0.0034139943789872214	9	0
bath	6	8.610136937058975	4	1	16	0.4467005076142132	0.0016324240242045845	10	1
bathroom	2	8.942983665985647	8	1	10	0.38233164373642287	0.0008989220711951331	9	1
bathtub	1	6.683360945766275	7	1	52	0.4436974789915966	0.0022011263406950935	9	1
be	13	13.69984939454392	2	0	224	0.631578947368421	0.01405037988015442	13	0
beach	2	8.98594603876032	5	1	9	0.4183835182250396	0.0008708895503012847	6	1
beads	1	6.253828811575473	5	1	11	0.3955056179775281	0.0010041954949789227	11	0
beans	5	7.696212639346407	5	1	54	0.4389027431421446	0.0021680696908794633	5	1
bear	15	9.335209354022052	4	1	73	0.49299719887955185	0.0036946987765919554	13	1
because	1	11.978343596874335	7	0	27	0.44036697247706424	0.0016643965440928197	2	0
bed	13	10.362809333435003	3	1	52	0.4925373134328358	0.0037600750925083446	21	1
bedroom	1	8.488587934405903	7	1	33	0.4200477326968974	0.0016275027735257164	11	0
bee	2	7.563200592358071	3	1	7	0.4024390243902439	0.0013395924744051386	2	1
before	4	11.67694726459275	6	0	12	0.42409638554216866	0.0010371176021407458	3	0
behind	8	10.301625885257831	6	0	8	0.3963963963963964	0.0008810037070951038	7	0
belt	10	8.12355783506165	4	1	23	0.3963963963963964	0.0012705291311887277	2	0
bench	8	7.273092595999522	5	1	83	0.4786944696282865	0.003135149399780021	5	0
better	13	11.675656371999178	6	0	16	0.43243243243243246	0.0018275579585092885	2	0
bicycle	2	7.232010331664759	7	1	5	0.351765489673551	0.0007318677003787927	5	1
big	17	11.430108913747297	3	0	48	0.4743935309973046	0.003126985466759988	17	1
bird	6	9.097059685517216	4	1	29	0.4701691896705254	0.002011976912147722	20	1
bite	13	8.699514748210191	4	0	33	0.473967684021544	0.0026526235756659227	12	1
black	19	10.257448817777178	5	0	25	0.4595300261096606	0.0020108584893593203	21	0
blanket	6	7.515889085215125	7	1	9	0.4105754276827372	0.0008768024130101837	8	1
block	28	8.602453035367061	5	1	20	0.4532188841201717	0.001938519096501357	10	1
blow	29	9.558811758564227	4	0	15	0.44036697247706424	0.001620407732306682	11	1
blue	16	9.673885691160871	4	0	26	0.4656084656084656	0.0023372927521009773	20	1
boat	3	9.676712414987868	4	1	55	0.4861878453038674	0.0029728175017879506	8	1
book	13	10.144235237798695	4	1	40	0.46033129904097647	0.0028118112827935186	13	1
boots	9	8.117610746466228	5	1	50	0.4342105263157895	0.0021882925685304624	9	1
bottle	5	9.020268861722167	6	1	37	0.45051194539249145	0.0017555995575741922	7	1
bowl	12	7.904703913873747	4	1	51	0.4656084656084656	0.0027145557935923073	11	1
box	13	9.444858981311897	3	1	91	0.5171400587659157	0.0036349684999990176	12	1
boy	5	11.279567422915699	3	1	36	0.4647887323943662	0.002952650264375155	15	1
bread	3	8.776630098427717	5	1	56	0.45051194539249145	0.0029251269986582122	16	1
break	76	10.352650515910012	5	0	28	0.4528301886792453	0.001714912888459636	20	1
breakfast	3	9.058121158998672	9	1	13	0.4200477326968974	0.0010345265430628879	8	1
bring	11	10.90802722863092	5	0	20	0.4467005076142132	0.0013791162383981529	8	0
broken	13	9.362546304865514	6	0	6	0.3399871216999356	0.0007650309543444072	6	1
broom	5	6.598509028614515	5	1	50	0.43528441879637264	0.0027098500582231084	6	1
brother	5	10.920745162161406	7	1	5	0.39461883408071746	0.0007187200349566271	4	0
brown	5	8.816111895794005	5	0	12	0.3893805309734513	0.0009778902716695431	12	0
brush	15	7.650168700845001	5	1	46	0.4748201438848921	0.0023048790242480434	8	1
bubbles	9	6.725033642166843	7	1	6	0.3565158676569885	0.000740980365309096	6	1
bucket	4	7.44716835960004	6	1	50	0.43492586490939045	0.0020983596148508314	6	0
bug	7	7.924072324923417	3	1	12	0.41509433962264153	0.0020497959025388866	8	1
build	12	8.991811158212718	5	0	9	0.43926788685524126	0.0009343514455353161	4	0
bump	8	7.38770923908104	4	0	8	0.4080370942812983	0.0013294836160819613	6	0
bunny	2	7.602900462204755	5	1	63	0.5033365109628217	0.0033919098609385646	14	1
bus	7	9.280332743796217	3	1	48	0.4861878453038674	0.0026454008147890973	7	1
butter	3	7.904334842085095	6	1	14	0.3758007117437722	0.0017406669780000946	13	1
butterfly	5	7.255591274253665	9	1	54	0.46684350132625996	0.0022227142537618485	7	1
buttocks	1	5.768320995793772	8	0	8	0.35967302452316074	0.0008456198405667901	8	1
button	9	8.255048902752295	6	1	12	0.4292682926829268	0.0010658256847234603	10	1
buy	6	10.327610842462827	3	0	20	0.4497444633730835	0.002142166540522239	6	0
bye	2	10.745614926107391	3	0	12	0.4125	0.0018492966044858187	3	1
cake	4	8.77137018531062	4	1	39	0.4647887323943662	0.0027584774634241095	15	1
camera	2	9.271153211372695	6	1	3	0.3862472567666423	0.0006566375170877486	2	0
camping	1	6.71295620067707	7	1	2	0.3306199123356293	0.0005844147680139012	2	0
candy	2	8.37216741936598	5	1	12	0.38067772170151404	0.0010003919548089593	12	1
car	5	11.153031058404522	3	1	79	0.5047801147227533	0.0039021607373671548	29	1
careful	5	9.973246796950981	7	0	6	0.41379310344827586	0.0008074494878381642	3	0
carrots	4	6.318968113746434	7	1	35	0.4512820512820513	0.0017798448210145975	11	1
carry	41	9.455323689894849	5	0	13	0.41871530531324347	0.001065144357637588	12	0
cat	9	9.296334565143043	3	1	52	0.4791288566243194	0.003448128188423879	17	1
catch	39	9.974644746852457	5	0	16	0.4345679012345679	0.001390737073428172	8	1
cereal	4	6.326149473155099	6	1	8	0.4183835182250396	0.0008395020091854353	7	1
chair	7	8.762646029650282	5	1	61	0.4971751412429379	0.0030530515132406373	11	1
chalk	5	6.470799503782602	5	1	4	0.34196891191709844	0.00114546954906477	3	0
chase	6	8.282735880201754	5	0	6	0.36768802228412256	0.000747895311750058	6	0
cheek	5	7.22402480828583	5	1	8	0.36114911080711354	0.0018302289594915324	6	1
cheese	4	8.45553053102413	6	1	59	0.4821917808219178	0.0030454520372446142	11	1
child	4	10.437785532487261	5	1	19	0.39520958083832336	0.0013059428346132813	19	0
chocolate	3	8.37516869138682	9	1	13	0.3715693173821253	0.0010422164744575925	13	0
church	5	9.459541457609681	6	1	20	0.3969924812030075	0.0010794495170158998	0	0
circus	5	7.967973179662935	6	1	6	0.358695652173913	0.0007617020937143281	6	0
climb	9	8.288031567776464	5	0	9	0.37633642195295797	0.0008727029102332414	8	0
clock	2	8.496582237512113	5	1	24	0.4370860927152318	0.0017303364286040664	2	1
close	37	10.464616480811362	5	0	16	0.4254633360193392	0.001229389512430359	12	1
closet	5	7.965545573129992	6	1	33	0.4200477326968974	0.0016267980748404616	8	0
cloud	14	7.835579246669965	5	1	8	0.35083056478405317	0.0018361027341586428	6	0
clown	3	7.736307096548285	5	1	7	0.4039785768936496	0.0012822983902923263	5	0
coat	6	8.80732226751107	4	1	50	0.4689165186500888	0.003082093964183014	10	1
coffee	4	9.914823062199874	6	1	13	0.4433249370277078	0.0010471093320583303	8	1
coke	3	7.893945138235959	4	1	9	0.3609022556390977	0.0015337916405542109	6	0
cold	16	10.115893663307597	4	0	41	0.4782608695652174	0.0029003458296337184	35	1
comb	8	6.859614903654202	4	1	75	0.48395967002749773	0.0036828391150835623	2	1
cook	6	8.951958168569265	4	0	14	0.42375601926163725	0.002097127209659636	9	1
cookie	3	7.447751280047908	6	1	18	0.44110275689223055	0.001467123686738441	11	1
corn	9	7.70210434005105	4	1	31	0.40615384615384614	0.0015467865486280996	8	1
couch	4	7.78155595923534	5	1	62	0.45517241379310347	0.002843068633505956	6	1
country	5	10.337799235201873	7	1	6	0.3548387096774194	0.0007806671951711807	6	0
cover	36	9.462110252078716	5	0	12	0.3940298507462687	0.0010538537006574535	12	0
cow	4	8.434028950155469	3	1	67	0.4939195509822264	0.003329612391194227	11	1
cowboy	3	7.750614732770409	6	1	6	0.4045977011494253	0.0007690947937342949	5	0
cracker	5	6.405228458030842	7	1	10	0.44	0.0009255645526092364	8	1
crayon	2	4.605170185988092	6	1	38	0.4664310954063604	0.0019010194209375547	8	1
crib	8	6.428105272684596	4	1	3	0.3659043659043659	0.0006175191133985204	3	1
cry	12	9.470856776355195	3	0	20	0.4292682926829268	0.0017392732375624638	11	1
cup	11	8.973984926689743	3	1	54	0.4884366327474561	0.0031264005359358613	11	1
cut	70	10.50413559859915	3	0	22	0.45753899480069327	0.0022147382615592933	13	0
cute	2	9.25540933534376	4	0	17	0.43853820598006643	0.001231530420713034	15	0
daddy	1	10.13034420176222	5	1	32	0.4470787468247248	0.0018536303924106142	2	1
dance	7	10.122703400512357	5	0	16	0.4345679012345679	0.0011903265244375561	11	1
dark	16	9.6822172456036	4	0	17	0.3922734026745914	0.0018925785509912316	16	0
day	9	11.801549593547763	3	0	19	0.43672456575682383	0.0016854535120814744	9	0
deer	1	7.259819610363186	4	1	59	0.4516680923866553	0.0032091635203717536	5	0
diaper	2	6.061456918928017	6	1	8	0.41871530531324347	0.0008410760952016241	4	1
dinner	2	10.08108965687996	6	1	14	0.4370860927152318	0.0011056204906116983	10	1
dirty	13	9.325542301664866	5	0	19	0.4425817267393127	0.0013112238305391286	16	1
dish	8	7.517520850603031	4	1	56	0.45714285714285713	0.0028798602900780403	15	0
do	15	13.768429432555779	2	0	125	0.55	0.007263927392730434	12	1
doctor	6	10.62261919381804	6	1	7	0.41217798594847777	0.0008271046218369893	5	1
dog	8	10.3702985908827	3	1	63	0.4879852125693161	0.003358346696939634	26	1
doll	2	8.179199798423086	4	1	26	0.4664310954063604	0.0017994672506522567	9	1
donut	1	5.545177444479562	5	1	8	0.3582089552238806	0.0008255098573295745	8	0
door	5	10.91264912781489	4	1	55	0.4813126709206928	0.0038266648097376992	13	1
down	26	12.311571651597761	4	0	51	0.4813126709206928	0.0026918322398229158	20	1
downtown	3	7.898039690764619	8	1	5	0.34152652005174644	0.0007327942594385141	5	0
draw	45	8.783396232190894	4	0	13	0.4282238442822384	0.0013521331272296517	7	0
drawer	3	7.351158226430694	6	1	4	0.34285714285714286	0.00118997481477564	2	0
dress	21	9.437396260110308	5	1	44	0.4743935309973046	0.002163581883935677	12	1
drive	34	10.014894750110258	5	0	14	0.43528441879637264	0.0018394183018449715	10	1
drop	32	9.854454858958817	4	0	15	0.415748031496063	0.0011333684942343202	14	0
dryer	1	6.124683390894205	5	1	4	0.33954983922829585	0.0013281387746544712	3	0
duck	8	8.214735833382303	4	1	46	0.47956403269754766	0.0020176902229903245	6	1
dump	10	8.250620082174692	4	0	9	0.35294117647058826	0.0018858786578389696	7	0
ear	5	8.459987717645458	3	1	11	0.4292682926829268	0.0014469632484399918	6	1
eat	6	10.728123415808568	3	0	64	0.4925373134328358	0.003631733276656874	45	1
egg	5	8.286017468404763	3	1	18	0.4470787468247248	0.0019348871010896086	12	1
elephant	2	7.659642954564682	8	1	50	0.4414715719063545	0.002203793541617755	9	1
empty	10	9.137662146478197	5	0	9	0.41904761904761906	0.0009158140658640242	8	0
eye	6	9.817493839369153	3	1	21	0.43349753694581283	0.002231740587189315	11	1
face	22	10.756114047641395	4	1	17	0.43817427385892116	0.001296816764432026	14	1
fall	43	9.878836189094999	4	0	26	0.4342105263157895	0.0022032599520782235	16	1
farm	4	8.659213451436667	4	1	12	0.42038216560509556	0.0017068873774320772	9	0
fast	16	9.975854724662028	4	0	17	0.44221105527638194	0.0022790835711930385	13	0
feed	12	8.851663425366777	4	0	12	0.4292682926829268	0.0015853897712490976	10	0
feet	11	9.860893154903707	4	1	12	0.43492586490939045	0.001036890772678127	9	1
find	18	11.731916406121195	4	0	16	0.4230769230769231	0.002068939713103874	4	0
fine	10	11.307277961272769	4	0	11	0.42443729903536975	0.0018377844449697506	8	0
finger	7	8.674025985443025	6	1	17	0.42683912691996767	0.0012418688153914893	10	1
finish	15	9.650528916142733	6	0	8	0.38316400580551524	0.0009005531007892797	3	0
fireman	4	6.248042874508429	7	1	5	0.3697478991596639	0.0007043233391197635	5	0
first	16	11.79396804469059	5	0	15	0.42649434571890144	0.0016770983993489455	4	0
fix	17	9.393245092030718	3	0	10	0.4064665127020785	0.000906771735363085	4	1
flag	12	8.100464891029363	4	1	2	0.2979683972911964	0.0005948949116847009	2	0
flower	4	8.381831553485561	6	1	13	0.4451939291736931	0.0011157240017412241	11	1
food	3	10.131738041218483	4	1	66	0.49025069637883006	0.0036859178383616053	62	1
for	2	13.890708007850117	3	0	62	0.4813126709206928	0.003975241601739085	5	0
fork	9	7.003065458786462	4	1	39	0.43137254901960786	0.0020945616048033836	7	1
friend	4	11.11994213436412	6	1	24	0.44481887110362256	0.0015710692362759919	19	0
frog	4	7.489412083508719	4	1	39	0.4731182795698925	0.0017740203787849677	5	1
full	13	10.263362371409995	4	0	10	0.41871530531324347	0.0016038099968809828	6	0
game	14	10.355963464913646	4	1	15	0.4331419196062346	0.001537302903986324	10	0
garage	3	8.075271546297458	6	1	39	0.43278688524590164	0.0018268829640263654	6	0
garbage	3	8.105609402299896	7	1	7	0.3671766342141864	0.0008012716883735515	7	0
garden	4	8.722580021141189	6	1	7	0.36615811373092927	0.0007850111379067674	7	0
gentle	10	8.025843344150903	6	0	5	0.3464566929133858	0.0007054747673858195	5	0
get	37	13.371497430393685	3	0	76	0.5146198830409356	0.004127978607511967	11	1
giraffe	1	5.793013608384144	7	1	41	0.42273819055244194	0.0018365489424272794	5	0
girl	5	11.386488844821573	4	1	27	0.4429530201342282	0.0017537641902156172	21	1
give	45	12.147844836561616	4	0	28	0.4261501210653753	0.0017905408399467135	11	0
glass	12	9.328123407632566	5	1	18	0.45012787723785164	0.0019398237686460568	15	1
glasses	1	8.562357743370612	7	0	7	0.3707865168539326	0.0007938570947006329	7	1
gloves	3	7.577121930876679	6	1	14	0.3776824034334764	0.0010412732274813685	5	0
glue	3	6.875232087276577	4	1	7	0.3653979238754325	0.0014599646103492076	6	0
go	35	13.343272434093846	2	0	97	0.5253731343283582	0.006064309511882918	12	1
good	28	12.89560078525473	4	0	50	0.4835164835164835	0.0027507840241051654	22	1
goose	6	7.544861068658458	5	1	52	0.4360033030553262	0.0024341176931101695	5	0
grandma	1	8.948455992345542	7	1	5	0.3378119001919386	0.0007285294653487641	5	1
grandpa	1	8.817297783866575	7	1	5	0.34152652005174644	0.0007665243939683998	5	1
grapes	3	6.694562058521095	6	1	58	0.4520547945205479	0.0024274554409504166	9	1
grass	10	8.129764445794171	5	1	11	0.37209302325581395	0.0016423160734429338	10	1
green	11	9.355479137642421	5	0	27	0.46519823788546255	0.0016963756997015085	23	0
gum	10	7.434847875211999	3	1	9	0.3651452282157676	0.001202877649967619	8	0
hair	6	10.014402613107283	4	1	33	0.45595854922279794	0.003231238249266544	19	1
hamburger	2	6.635946555686647	9	1	5	0.351765489673551	0.000712060312621415	5	1
hammer	10	7.682021510826875	6	1	45	0.4583333333333333	0.0019310134539836528	3	0
hand	16	10.786366268065041	4	1	26	0.44221105527638194	0.0016296689741446182	13	1
happy	5	10.930621741236532	5	0	21	0.44221105527638194	0.0014932590692053392	19	1
hard	22	10.791934211180285	4	0	19	0.4485981308411215	0.0020383640922321286	14	0
hat	4	9.167745974343763	3	1	22	0.46437994722955145	0.002543629695921641	11	1
hate	2	10.230919044505193	4	0	7	0.36666666666666664	0.0010830017344126844	5	0
have	20	13.790392729982651	4	0	78	0.5067178502879078	0.004145566969329601	7	0
he	3	13.963200986661555	2	0	73	0.4985835694050991	0.005111434509645391	5	0
head	42	10.959592399337474	4	1	34	0.4635645302897278	0.002757906713903061	21	1
hear	5	11.339773736496767	4	0	14	0.4292682926829268	0.0018448244333251172	5	0
heavy	30	9.091556835986216	5	0	8	0.42105263157894735	0.000835843869643415	7	1
helicopter	1	7.687538766201629	10	1	33	0.4105754276827372	0.00158914736136651	4	1
help	13	11.83736126776631	4	0	32	0.4370860927152318	0.001887220708561452	18	1
hen	4	6.825460036255307	3	1	10	0.3943241224794623	0.001496166171511961	6	0
her	2	12.943045305630148	3	0	31	0.44221105527638194	0.0024115232241976067	5	0
here	6	13.4706088933306	4	0	56	0.49162011173184356	0.0036921400708078735	9	1
hi	2	11.16284302833769	2	0	12	0.4018264840182648	0.0018887686297175991	3	1
hide	6	9.484253080341965	4	0	15	0.43172526573998365	0.0015608064195012012	8	0
high	18	10.364418902828275	4	0	14	0.38995568685376664	0.0019155293136706368	8	0
him	1	13.187798996029594	3	0	33	0.43636363636363634	0.00228693471917589	2	0
hit	24	10.5505384372031	3	0	28	0.4342105263157895	0.002925244355558741	16	1
hold	45	11.055403613226549	4	0	25	0.4611353711790393	0.002227927587529961	16	0
home	17	11.690611293359655	4	1	26	0.45438898450946646	0.002124622880177543	12	1
horse	6	9.705707120679628	5	1	64	0.48663594470046084	0.002864567800021268	16	1
hose	4	6.725033642166843	4	1	56	0.4524421593830334	0.002825821714217806	9	0
hot	21	10.224410958767711	3	0	24	0.45595854922279794	0.0022065456251231606	18	1
house	14	11.295652150054389	5	1	100	0.5196850393700787	0.0049251760175336645	35	1
how	1	13.022982724453199	3	0	42	0.4701691896705254	0.003235277457857237	7	0
hug	3	7.940939762327791	3	0	8	0.4064665127020785	0.0011624696327395489	5	1
hungry	2	9.50822026940441	6	0	14	0.42996742671009774	0.0011025754274170438	12	1
hurry	6	10.484193653750324	5	0	9	0.3726182074805928	0.0012800213493746298	6	0
hurt	14	10.46001285555311	4	0	25	0.4374482187241094	0.0025382787074317292	14	1
ice	10	9.420763358881013	3	1	15	0.4086687306501548	0.0015836724701132443	12	1
inside	11	10.461587907067887	6	0	10	0.43137254901960786	0.0009266588508960885	4	1
jacket	7	8.419359831067474	6	1	32	0.42649434571890144	0.001766289895033715	9	1
jar	8	6.9411900550683745	3	1	27	0.4021325209444021	0.001484625163779116	8	1
jeans	2	6.841615476477592	5	1	31	0.41444270015698587	0.001648860564915537	7	0
jello	1	3.9512437185814275	5	1	5	0.3536503683858004	0.0007247926589386759	5	0
jelly	4	6.875232087276577	5	1	8	0.35699797160243407	0.0008309005812228666	8	0
juice	4	8.144388865547622	5	1	11	0.4213886671987231	0.0009562091194469687	7	1
jump	21	9.305923241869912	4	0	18	0.44	0.0018278284844927715	11	1
keys	19	9.033245134153809	4	1	44	0.4258064516129032	0.00261948682947388	4	0
kick	14	9.263596738276615	4	0	14	0.39140103780578206	0.0020826815163886105	8	0
kiss	6	9.870137572854574	4	0	13	0.4070932922127988	0.0014232288780849358	10	1
kitchen	1	9.064736398117391	7	1	14	0.43278688524590164	0.0010794831628112207	13	1
kitty	4	8.153349757998892	5	1	17	0.44	0.0013155243367702755	8	1
knee	3	7.73718007783463	4	1	12	0.4018264840182648	0.0019863779713361757	3	1
knife	4	8.973731569708402	5	1	33	0.4433249370277078	0.0020549279023924986	8	1
knock	11	9.20673387638207	5	0	9	0.3758007117437722	0.0015329148096091113	5	0
ladder	4	7.373374309910049	6	1	8	0.37446808510638296	0.0008438380311507642	8	0
lady	2	10.446015311032632	4	1	10	0.42961757526444266	0.0009294639426307378	8	0
lamb	5	7.590346945602565	4	1	57	0.46684350132625996	0.0030183137310682232	6	0
lamp	2	7.5126175446745105	4	1	8	0.36768802228412256	0.001522950799961085	3	0
last	21	11.545615282792886	4	0	10	0.4021325209444021	0.0014310459227079913	3	0
leg	9	9.103423089630105	3	1	15	0.42038216560509556	0.0018564605227096762	12	1
lick	7	7.392647520721623	4	0	12	0.3870967741935484	0.001825281281774371	7	0
light	46	10.280107270530456	5	1	25	0.46194225721784776	0.002327236638655471	17	1
like	13	13.297193610839841	4	0	55	0.48663594470046084	0.003110792631931154	8	0
lion	2	8.062432791583195	4	1	38	0.46153846153846156	0.0018286582478238217	6	1
lips	5	8.490027523343468	4	1	10	0.3656509695290859	0.0009182487608542427	10	1
listen	3	11.352322346193413	6	0	8	0.40152091254752853	0.000888323516955905	7	0
little	11	12.142168589743555	6	0	46	0.473542600896861	0.002500638203592171	9	0
lollipop	2	5.53338948872752	8	1	4	0.3424124513618677	0.0006600508600120322	4	0
long	12	11.61007032435659	4	0	21	0.4528301886792453	0.0014277133498458044	14	0
look	14	12.568456263935888	4	0	47	0.4786944696282865	0.0031006341566786138	8	1
loud	4	8.780326390946605	4	0	10	0.35294117647058826	0.0014400048211890197	9	0
love	10	12.148883054733641	4	0	25	0.400303260045489	0.0016560861884621428	23	1
lunch	3	9.436519311833914	5	1	14	0.44	0.0011198630872314044	11	1
mad	4	9.849664745838622	3	0	9	0.42375601926163725	0.001499506711842132	3	0
mailman	1	5.6240175061873385	7	1	2	0.34108527131782945	0.0005765454888040173	2	0
make	51	12.222747838478119	4	0	43	0.473967684021544	0.0028836639904301076	7	0
man	13	12.619615044317726	3	1	32	0.46275197195442597	0.002529493325275158	24	1
me	1	14.183043935157833	2	0	58	0.4782608695652174	0.004007711575284479	14	1
meat	3	8.950143756459262	4	1	11	0.39111111111111113	0.0013907095586580456	10	1
medicine	5	8.708639655987193	8	1	15	0.4436974789915966	0.0011870551550418975	13	1
meow	3	6.238324625039508	4	0	4	0.39198218262806234	0.0007262003915794306	2	1
milk	6	8.96392819372262	4	1	27	0.46234676007005254	0.0016085768545650377	18	1
mine	6	10.626800147427799	4	0	6	0.41444270015698587	0.0011955719541416362	3	1
mittens	1	4.852030263919617	7	1	16	0.3972911963882618	0.001115399176705478	7	0
mommy	1	9.175438319966918	5	1	30	0.44110275689223055	0.0017546174656068972	3	1
money	3	11.607180542895733	5	1	23	0.4180522565320665	0.0024184754137094645	21	1
moo	3	6.091309882077698	3	0	4	0.3534136546184739	0.0012385916353637523	1	1
moon	7	9.31641063570325	4	1	11	0.37446808510638296	0.0017598166428194743	9	1
moose	1	6.745236349484363	5	1	54	0.4485981308411215	0.003144687196287901	7	0
mop	3	6.444131256700441	3	1	5	0.35699797160243407	0.0007395303298727163	5	0
more	5	12.246091117312481	4	0	30	0.4440706476030278	0.002357196596136212	5	1
morning	4	11.142615122936439	7	0	20	0.43781094527363185	0.0013789360562263672	15	0
motorcycle	2	7.201170883281678	10	1	20	0.4254633360193392	0.0012329285360732785	6	1
mouse	6	7.876258882303226	5	1	54	0.47782805429864256	0.0030008558035401157	8	1
mouth	11	9.73495055071279	5	1	29	0.47100802854594115	0.002049385299358235	20	1
movie	1	9.677151410322754	5	1	8	0.3553162853297443	0.0008824941492557964	8	0
much	8	11.963370312187111	4	0	8	0.39819004524886875	0.0015333816740615283	4	0
muffin	1	6.063785208687608	6	1	6	0.3448726322664925	0.0007395483463284305	6	0
nail	10	7.818430272070656	4	1	7	0.3534136546184739	0.0008263688450288211	7	0
nap	6	7.252053951852814	3	1	9	0.40930232558139534	0.0008911956353746534	8	1
napkin	2	5.963579343618446	6	1	56	0.46194225721784776	0.0024327927570529304	11	1
necklace	1	7.45876269238096	8	1	20	0.39111111111111113	0.001126793011445886	1	0
need	7	12.107174536800002	4	0	17	0.42375601926163725	0.0016215947403489222	6	0
new	10	11.566551536316604	3	0	12	0.42857142857142855	0.001619038472512529	2	0
nice	5	11.429685150396484	4	0	33	0.44821731748726656	0.0025008130652301617	20	0
night	7	11.737883369350026	5	0	29	0.46194225721784776	0.0025475430526076715	17	1
no	6	13.748766940721664	2	0	65	0.4971751412429379	0.004491417722500182	7	1
noisy	2	6.923628628138427	5	0	5	0.3314500941619586	0.0007247095493229915	5	0
none	5	9.75973264889099	4	0	8	0.3633860977288369	0.0014913593591105992	6	0
noodles	2	7.1731917424865985	7	1	8	0.36238846945778996	0.0008225437188618056	8	1
nose	14	9.184817414745098	4	1	21	0.4489795918367347	0.0019105666615849492	12	1
not	1	13.670225792840633	3	0	51	0.46194225721784776	0.003126892951621605	7	0
now	9	13.113526446491344	3	0	55	0.47653429602888087	0.0033621891463875464	13	1
nurse	7	8.748939631537715	5	1	5	0.34285714285714286	0.0013805865727011168	4	0
nuts	2	8.89877535906107	4	1	5	0.35603506405933916	0.0007255335611267729	5	0
off	10	12.079749496696092	3	0	23	0.43963363863447125	0.0019956381948816513	7	1
old	8	11.603743753136092	3	0	16	0.4470787468247248	0.0019765538397745934	11	0
on	6	13.843562400068825	2	0	78	0.5176470588235295	0.004543758694213184	5	1
open	36	10.888632479615456	4	0	16	0.43781094527363185	0.0013326760471516139	10	1
other	6	11.666187178355308	5	0	22	0.4360033030553262	0.0014731483404674386	5	0
ouch	1	7.890208213109961	4	0	4	0.36213991769547327	0.001230151003536193	2	1
out	19	13.175255592836068	3	0	57	0.47610459873760147	0.0036373291554924517	18	1
outside	15	10.188779270365272	7	1	16	0.4310204081632653	0.0011989759495923367	13	1
oven	1	7.110696122978827	4	1	32	0.41089494163424123	0.0015747166708359396	6	0
over	8	12.170284833224308	4	0	30	0.4528301886792453	0.001901751647479784	8	0
owl	1	6.983789965258135	3	1	29	0.4251207729468599	0.002078318066156445	5	0
paint	7	8.61341204915678	5	0	14	0.43636363636363634	0.0011407886193958773	13	0
pajamas	2	6.536691597591305	7	1	22	0.40584166026133744	0.001272714495926051	5	1
pants	1	8.960210955576986	5	1	63	0.48395967002749773	0.002822517947267328	14	1
paper	9	9.534667728624708	5	1	34	0.46397188049209137	0.0019895294041610487	24	1
park	7	9.254070134837509	4	1	15	0.39373601789709173	0.001799006266393	14	1
party	6	10.385728499446342	5	1	21	0.44783715012722647	0.0021032587716651734	18	0
peas	3	6.452048954437226	4	1	62	0.45595854922279794	0.0032287469532511623	9	1
pen	6	8.225503097566918	3	1	75	0.4830741079597438	0.0035713781860620443	7	1
pencil	5	7.229113877793302	6	1	47	0.47782805429864256	0.0021197269095214956	6	1
penguin	1	6.3578422665081	7	1	51	0.44221105527638194	0.002080814945031873	8	0
penny	2	8.240648863374913	5	1	4	0.4230769230769231	0.000878501667863496	1	0
people	6	12.081970939053107	6	1	22	0.4463229078613694	0.0014443364392533568	10	0
person	3	10.355613575443341	6	1	17	0.4370860927152318	0.0012704425139449245	16	0
pick	21	10.16665918330341	4	0	16	0.4463229078613694	0.0019359312058810792	7	0
pickle	3	6.295266001439646	6	1	44	0.42273819055244194	0.0026085551253683214	6	1
picnic	4	7.359467638255621	6	1	9	0.3793103448275862	0.0008738046695677191	9	0
picture	12	9.820975130961664	7	1	13	0.4160756501182033	0.0010849576623305109	4	1
pig	9	8.900821604915228	3	1	57	0.4939195509822264	0.0028734910642975843	9	1
pillow	2	7.2909747781429814	6	1	33	0.4247787610619469	0.0016365805538913147	10	1
pizza	1	8.09925056179696	5	1	6	0.3659043659043659	0.0007444032635098341	6	1
plant	10	8.453187861440325	5	1	6	0.35991820040899797	0.0007378070067647485	6	0
plate	16	8.251142139090751	5	1	55	0.45993031358885017	0.0032608734409766155	12	1
play	52	10.918899375278091	4	0	44	0.47610459873760147	0.0030267473775461417	15	1
playground	2	6.423246963533519	10	1	4	0.3302063789868668	0.000664334696291574	4	0
please	4	12.168355201900862	6	0	12	0.39461883408071746	0.001096468193712959	9	1
police	2	10.703918398315748	6	1	8	0.37985611510791367	0.000839573990802287	8	0
pony	5	6.948897222313312	4	1	50	0.43853820598006643	0.002048548817713857	2	0
pool	11	8.592486175451668	4	1	10	0.3868131868131868	0.0010860332397964077	9	1
poor	7	10.225281154616678	4	0	12	0.38909358879882094	0.0017412176668021814	8	0
popcorn	2	6.699500340161678	7	1	6	0.35748138117806366	0.0007470997959593145	6	1
porch	1	6.92461239604856	5	1	6	0.3776824034334764	0.000743581035572446	6	0
potato	2	7.432483807917119	6	1	36	0.41904761904761906	0.0016760572309499817	8	0
potty	5	5.6240175061873385	5	1	29	0.416403785488959	0.0022152679684138018	8	1
pour	6	7.9208096792886	4	0	13	0.4167324388318863	0.0017870315160691606	8	0
present	18	9.63782786411884	7	1	9	0.41739130434782606	0.000895151229984459	7	1
pretend	8	8.670943791222156	7	0	4	0.4177215189873418	0.0006948466082431223	1	0
pretty	3	10.832970878196265	6	0	21	0.4414715719063545	0.0013627275854499223	13	1
pudding	3	6.866933284461882	7	1	6	0.3553162853297443	0.0007524857918210647	6	0
pull	24	9.898123190036978	4	0	17	0.44036697247706424	0.0025393222991722773	6	0
pumpkin	2	6.835184586147301	7	1	42	0.45714285714285713	0.001777559647061542	1	0
puppy	2	7.463936604468925	5	1	7	0.4006069802731411	0.0007993102174300192	6	1
purse	6	7.795234929002173	5	1	5	0.3365200764818356	0.0013751628673526058	4	1
push	15	9.25874951118387	4	0	21	0.42857142857142855	0.0020172278484156558	8	1
put	10	11.690728495248413	3	0	54	0.49299719887955185	0.003781802932121282	9	0
puzzle	4	6.902742737158593	6	1	5	0.41509433962264153	0.0007341732754525091	2	1
quiet	13	10.062241904896988	5	0	6	0.33954983922829585	0.0007712406015485163	6	0
radio	5	9.598659321249377	5	1	9	0.3653979238754325	0.0010011375717854918	6	0
rain	4	9.157256000883727	4	1	15	0.3908216136195411	0.0015265971650598794	14	1
raisin	1	5.220355825078324	6	1	51	0.43349753694581283	0.0021253429537274214	5	1
read	12	10.529345766281573	4	0	16	0.43528441879637264	0.0016191565587545056	6	1
red	6	10.121015365064702	3	0	36	0.4826325411334552	0.0025021716139801086	28	1
refrigerator	1	6.674561391814426	12	1	4	0.35436241610738256	0.0006679822547006948	4	0
ride	16	9.778944217461527	4	0	29	0.45993031358885017	0.002163851515366711	19	1
rip	8	8.040768994367578	3	0	4	0.3375959079283887	0.000676536485671285	4	0
rock	8	9.6614159913364	4	1	26	0.45993031358885017	0.0019398677665289107	9	1
roof	5	8.669055540725484	4	1	4	0.35436241610738256	0.0011372915799077194	3	0
room	5	11.024546030034069	4	1	25	0.4607329842931937	0.0025925511774450615	15	1
rooster	1	6.878326468291325	7	1	42	0.4180522565320665	0.0017936438974058147	4	0
run	57	10.920636680720666	3	0	28	0.4489795918367347	0.0023880196614698137	20	1
sad	3	9.40960098282706	3	0	12	0.4055299539170507	0.0014331588155325017	10	0
salt	8	8.246695943718557	4	1	5	0.3534136546184739	0.0007026852898581119	5	0
same	4	11.157920554320716	4	0	7	0.39580209895052476	0.0020088271687644333	2	0
sandwich	3	7.866338923046544	8	1	13	0.4436974789915966	0.001112108015780267	11	1
sauce	4	7.704361167910313	5	1	8	0.35918367346938773	0.000830735823195447	8	0
say	13	12.458390459140501	3	0	50	0.46850044365572313	0.004088292087652382	5	0
scared	1	10.098272780745283	6	0	5	0.39373601789709173	0.000714607616976455	4	0
scarf	5	6.8658910748834385	5	1	50	0.4463229078613694	0.002228277788928978	9	0
school	10	10.780954292552702	6	1	26	0.45089666951323654	0.0017287324076859854	18	1
scissors	3	6.9650803456014065	8	1	35	0.41089494163424123	0.0016357253680335006	3	0
see	25	12.911108870482533	3	0	57	0.48484848484848486	0.0036084774904390333	8	1
shake	15	8.72891172506098	5	0	13	0.42206235011990406	0.0016372552595842749	8	0
share	10	9.3171298661577	5	0	14	0.41444270015698587	0.001763369351065853	8	0
she	1	13.193794340994467	3	0	45	0.4714285714285714	0.0033426917628675	4	0
sheep	3	8.106212902619962	5	1	45	0.4524421593830334	0.002153854584011278	8	1
shirt	2	8.858652969548489	5	1	36	0.46275197195442597	0.0021278715963347766	9	1
shopping	2	8.282230063296685	8	0	4	0.3562753036437247	0.0006892486215375607	3	0
shorts	2	6.9782137426306985	6	1	7	0.3550773369199731	0.0008113862377862001	7	1
shoulder	8	8.164225652265827	8	1	6	0.36238846945778996	0.0007553307721465984	6	0
shovel	5	6.74993119378857	6	1	28	0.39759036144578314	0.0014558299527948591	4	1
show	16	11.215139183159923	4	0	27	0.44556962025316454	0.002228713573254373	16	0
shower	11	8.576405051048084	6	1	13	0.38067772170151404	0.0010165972899779166	13	1
sick	9	10.161727940887767	4	0	17	0.4451939291736931	0.0025098357996156326	8	0
sidewalk	1	6.444131256700441	8	1	5	0.33396584440227706	0.0007235747424394506	5	0
sing	5	9.721785803621579	4	0	13	0.43528441879637264	0.0016060686321756488	6	1
sink	13	7.813187267521416	4	1	38	0.4254633360193392	0.0025105191740457983	10	1
sister	3	10.393783885049626	6	1	6	0.3404255319148936	0.0007769524231434094	6	0
sit	10	10.798432066390685	3	0	27	0.4497444633730835	0.002183633511448245	13	1
skate	3	6.642486801367256	5	0	3	0.3352380952380952	0.0006231527603214576	3	0
sky	2	9.18122047340233	3	1	11	0.38427947598253276	0.0010264766776740346	11	1
sled	2	5.87493073085203	4	1	62	0.45399828030954426	0.002429826681190202	0	1
sleep	6	10.629416491370417	5	0	29	0.45595854922279794	0.00317515234196342	20	1
sleepy	1	7.356918242356021	6	0	5	0.3482849604221636	0.001158483978747105	5	0
slow	11	9.332026890232783	4	0	12	0.38122743682310467	0.0016286730174233787	10	0
smile	3	9.221577003902171	5	0	12	0.40772200772200773	0.0010383478717477697	12	0
snack	2	7.013915474810528	5	1	9	0.3609022556390977	0.0008648954243321143	9	0
sneaker	2	3.9512437185814275	7	1	3	0.3494374586366645	0.000622918511188271	3	0
snow	5	8.695506726812653	4	1	14	0.4118564742589704	0.0015801455190173723	12	0
soap	4	7.769378609513984	4	1	10	0.3684577808792743	0.000893815532920388	10	1
soda	2	7.58629630715272	4	0	6	0.35967302452316074	0.0014237587355253529	5	1
sofa	1	7.027314514039777	4	1	35	0.4193804606830818	0.002358636336790606	4	0
soft	21	8.735846677457582	4	0	23	0.40993788819875776	0.0014851823677036963	23	0
some	6	12.424123249778374	4	0	45	0.4743935309973046	0.003151700683987094	5	0
soup	4	8.469472455204826	4	1	16	0.39580209895052476	0.0011529770598999616	16	1
spaghetti	2	6.930494765951626	9	1	5	0.34196891191709844	0.0006971332649401068	5	1
spill	10	7.098375638590786	5	0	8	0.39849056603773586	0.0008343113357069182	7	0
splash	13	6.597145701886651	6	0	6	0.3439739413680782	0.000748691687370701	6	0
spoon	5	7.037027614686276	5	1	50	0.47100802854594115	0.0024045352194762525	14	1
squirrel	2	6.669498089857879	8	1	59	0.4497444633730835	0.002297125081917172	4	0
stairs	1	8.27664912542186	6	1	9	0.3801295896328294	0.0009136484349078475	9	0
stand	24	10.516400340385468	5	0	9	0.40835266821345706	0.0008763701530392182	6	0
star	12	9.532351404751555	4	1	13	0.40993788819875776	0.0019717519485129655	10	1
stay	16	11.379199767755505	4	0	23	0.4436974789915966	0.0019119726310923687	11	0
stick	25	9.523836379320944	5	1	55	0.4893419833178869	0.0034672728402878788	17	0
sticky	5	6.682108597449809	6	0	10	0.35991820040899797	0.0011793583016962152	9	0
stone	10	9.024251728612985	5	1	54	0.4782608695652174	0.0029466923914036706	6	0
stop	22	11.752941865773812	4	0	22	0.45595854922279794	0.0019198985070538526	17	1
store	6	9.245707515813473	5	1	13	0.45478036175710596	0.001944972843666266	7	1
story	6	10.438986276507002	5	1	9	0.4045977011494253	0.0013055350882989216	5	0
stove	2	7.080867896690782	5	1	32	0.4009111617312073	0.0023918980902157567	6	1
strawberry	3	6.790097235513905	10	1	53	0.4470787468247248	0.0022464778256423377	9	0
street	5	10.018555795363802	6	1	10	0.42273819055244194	0.0009553308596630787	8	0
stuck	2	9.20029003612268	5	0	7	0.35748138117806366	0.0010905773891070512	7	0
sun	6	9.717459133810847	3	1	22	0.43385373870172556	0.0023662210036753963	18	1
sweater	2	7.1929342212158	7	1	29	0.42443729903536975	0.001580136067960712	6	0
sweep	15	7.354362330421477	5	0	5	0.3448726322664925	0.0011745000460909856	4	0
swim	6	8.569216219483389	4	0	12	0.4224	0.0013726223757390393	9	1
table	8	9.540650806483587	5	1	72	0.5057471264367817	0.003101732172921285	15	1
take	44	12.60797474699553	4	0	53	0.4786944696282865	0.00360587158864587	9	0
talk	11	11.663446709214385	4	0	24	0.44	0.001816244061643677	13	0
tape	8	8.937743936942443	4	1	35	0.47058823529411764	0.0020008495674489596	9	0
taste	13	9.070848393157585	5	0	13	0.3779527559055118	0.001072018042614165	12	0
teacher	2	9.330431852234003	7	1	5	0.35772357723577236	0.0007069320794982158	5	0
tear	9	8.399984990510696	4	0	14	0.40521872601688413	0.0017764586008144076	8	0
telephone	3	8.768263145371286	9	1	31	0.45635263612791704	0.001645558768149944	2	1
there	6	13.422500561916133	5	0	67	0.5101449275362319	0.004025758485342278	4	0
think	14	12.828236582268527	5	0	43	0.46153846153846156	0.0024610541043672083	7	0
thirsty	4	7.8336002236611035	7	0	7	0.3534136546184739	0.0007936493662532848	7	0
throw	20	9.833011438731804	5	0	21	0.44	0.0014735931050994158	11	1
tickle	5	6.529418838262226	6	0	5	0.3955056179775281	0.0014372102982665217	4	1
tiger	2	8.231642179973411	5	1	43	0.45478036175710596	0.0020048309552265563	8	1
time	15	12.605643751415895	4	0	36	0.44821731748726656	0.002216667301962767	21	0
tiny	1	8.591558273371545	4	0	4	0.39520958083832336	0.0006849291413160405	3	0
tired	2	9.861362626235456	5	0	16	0.4160756501182033	0.0011798156608367866	12	0
tissue	3	6.967909201801884	6	0	6	0.35748138117806366	0.0007393210553453177	6	1
toast	6	8.363575702750637	5	1	11	0.411214953271028	0.0009676593801586263	10	1
today	4	11.217264982816841	5	0	16	0.42273819055244194	0.0012196932750032398	8	0
toe	9	7.404887575616125	3	1	7	0.37314487632508836	0.0013677880135993861	4	1
tomorrow	3	10.98874438615708	8	0	11	0.4167324388318863	0.0009949378504687544	8	0
tongue	10	8.646816959209742	6	1	9	0.3601637107776262	0.0008705686061014166	9	1
tonight	2	10.915906311504504	7	0	11	0.4030534351145038	0.0009814144404810955	10	0
tooth	5	7.653020413804189	5	1	8	0.375	0.0008486587842134624	8	1
toothbrush	2	6.352629396319567	10	1	1	0.3221476510067114	0.0005568218320907174	1	1
touch	28	10.113707958559848	5	0	16	0.42375601926163725	0.0018611214197648677	12	0
towel	2	7.540090320145325	5	1	14	0.42649434571890144	0.0010855736579173073	12	1
toy	8	7.895808377083183	3	1	33	0.46234676007005254	0.002450689089121662	15	1
tractor	2	6.577861357721047	7	1	65	0.47696476964769646	0.002569695070876432	5	0
train	17	9.83483390921908	5	1	42	0.47610459873760147	0.0029057556623763676	7	1
trash	6	8.059592328887545	5	1	5	0.3466841759684833	0.0007130547813348493	5	0
tray	1	6.704414354964107	4	1	54	0.4425817267393127	0.003205443070799614	11	0
tree	6	9.300455261418444	4	1	27	0.46684350132625996	0.0016575700283513258	20	1
tricycle	1	4.356708826689592	8	1	59	0.4516680923866553	0.002356731267305991	4	0
truck	3	9.264544425989694	5	1	43	0.47956403269754766	0.0021174193098824406	11	1
try	10	11.169209052553029	3	0	7	0.38852097130242824	0.0016236668093344182	5	0
tummy	2	6.401917196727186	5	1	5	0.3562753036437247	0.0007058318331329579	5	1
tuna	4	6.694562058521095	4	1	44	0.42273819055244194	0.001802455369154631	1	0
turtle	4	7.220373836723949	6	1	60	0.45399828030954426	0.0023838748267668492	6	1
uncle	2	10.075379913839543	5	1	4	0.32532347504621073	0.0014262997944679851	3	0
under	11	10.589131655274922	5	0	14	0.4425817267393127	0.001121448791272927	8	0
underpants	1	6.115892125483034	10	1	3	0.32917705735660846	0.0006345610525946869	3	0
up	15	13.212399674705946	2	0	62	0.49025069637883006	0.004259458934120887	25	1
vacuum	5	6.792344427470809	6	1	4	0.34263465282284233	0.000701516604240357	4	0
vanilla	5	6.329720905522696	7	1	6	0.347597103357472	0.0007544232703296079	6	0
vitamins	1	6.272877006546167	8	1	3	0.38995568685376664	0.0006568924471008804	3	0
wait	6	11.746668641251048	4	0	22	0.44184100418410044	0.0019642365063545645	11	0
wake	8	9.841824892144022	4	0	16	0.43781094527363185	0.0021921650422720798	9	0
walk	17	10.380125376764875	4	0	25	0.44783715012722647	0.0022363869328680163	14	1
walker	4	7.599401333415815	6	1	6	0.3682008368200837	0.001415792526239714	5	0
wash	21	8.926915889777042	4	0	20	0.45399828030954426	0.0018858891344898593	16	1
water	10	10.683225188177172	5	1	57	0.4948453608247423	0.003546362523239054	45	1
wet	9	8.758883680017025	3	0	25	0.4497444633730835	0.0022855625109103614	18	1
what	3	14.219156011504799	4	0	128	0.5605095541401274	0.007222462066879846	7	1
when	2	12.653082686775488	4	0	38	0.46850044365572313	0.002884424739128203	7	0
where	2	12.607422631458862	5	0	56	0.49070631970260226	0.0038135150182171916	7	0
white	17	10.225571051705241	5	0	35	0.4635645302897278	0.002984259259666382	27	0
who	1	12.811349898833479	3	0	41	0.4524421593830334	0.003055903259526067	10	0
why	3	12.793145166603392	3	0	43	0.46153846153846156	0.0032295573231588886	7	0
will	6	12.932632841784862	4	0	29	0.43636363636363634	0.002136670405974147	1	0
wind	15	9.396902923027392	4	1	8	0.4070932922127988	0.0013228128942553681	6	0
window	8	9.466841326944389	6	1	11	0.43672456575682383	0.0010602514238412534	8	1
wipe	2	8.018954683155718	4	0	18	0.4360033030553262	0.001528956452836866	15	0
wish	10	10.511703010307613	4	0	6	0.3671766342141864	0.0017091442902767882	3	0
with	1	13.564355831216114	4	0	56	0.4852941176470588	0.0034138701514438772	4	0
wolf	4	8.415824697027949	4	1	11	0.384	0.0009728580561252068	11	0
woods	1	8.42989086301344	5	1	11	0.3679442508710801	0.0009918911966544544	11	0
write	10	10.061345637151708	5	0	20	0.4489795918367347	0.0020427743140979705	9	0
yard	9	8.255308811785596	4	1	9	0.3826086956521739	0.0015437055043912224	8	0
yellow	8	8.580167990577626	6	0	22	0.45714285714285713	0.0014475116756328833	19	0
yes	1	12.83856973519935	3	0	34	0.45399828030954426	0.00187944767900499	5	1
yesterday	4	9.75359446296151	9	0	9	0.41379310344827586	0.0009208989870478774	5	0
yogurt	1	5.883322388488279	6	1	6	0.3633860977288369	0.000742081189922301	6	0
you	1	15.653040079857101	3	0	204	0.6153846153846154	0.01407121836296444	7	1
yucky	1	4.31748811353631	5	0	8	0.3694891532540238	0.0008301330767419619	8	1
zebra	1	6.008813185442595	5	1	42	0.41971383147853736	0.0018957392828602379	5	0
zipper	2	6.124683390894205	6	1	9	0.3715693173821253	0.0008775723075917397	9	1
zoo	1	7.51479976048867	3	1	11	0.41871530531324347	0.001428002425022533	7	0
